# Supplementary material for: Serum Trimethylamine N-Oxide Level Is Positively Associated with Aortic Stiffness Measured by Carotid–Femoral Pulse Wave Velocity in Patients Undergoing Maintenance Hemodialysis
Source: MDPI journal article supplement (doi:10.3390/toxins15090572), 2023-09-17
Supplement: s1 [file s1]

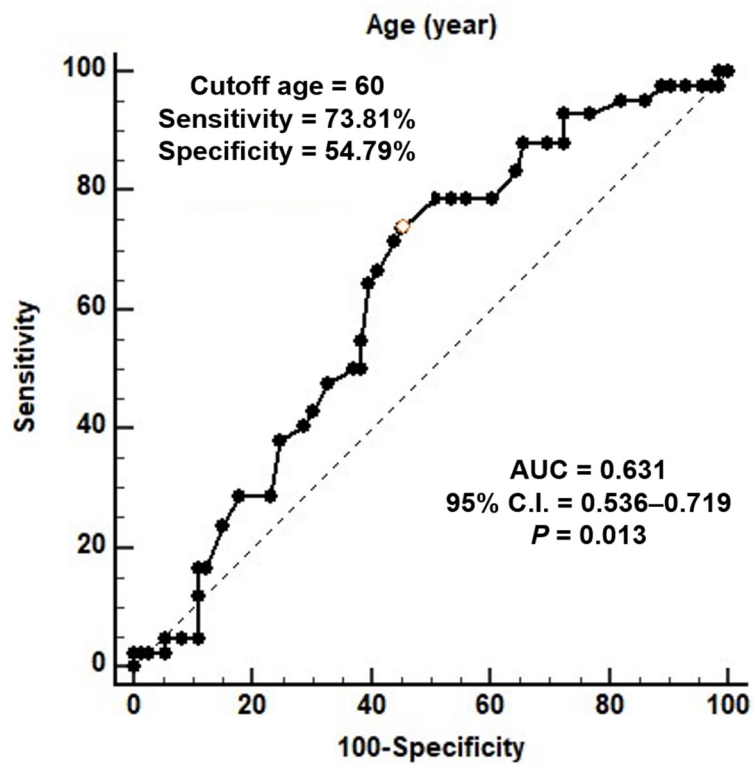

**Figure S1.** The receiver operating characteristic curve analysis of age in the prediction of aortic stiffness in patients on maintenance hemodialysis.
